# Supplementary material for: In Vitro Anticandidal Activity and Mechanism of a Polyoxovanadate Functionalized by Zn-Fluconazole Complexes
Source: PubMed Central journal article supplement (PMC6100367; doi:10.3390/molecules23051122), 2018-05-09
Supplement: molecules-23-01122-s001.pdf [file molecules-23-01122-s001.pdf]

## Supplementary Information

### Antifungal activities and mechanism of a polyoxovanadate functionalized by Zn-fluconazole complexes

Shuanli Guo<sup>a,†</sup>, Wei Yang<sup>b,†</sup>, Mingming Zhao<sup>a</sup>, RuiTian<sup>a</sup>, Boyu Zhang<sup>a</sup>, Yanfei  
Qi<sup>a,\*</sup>

<sup>a</sup>School of Public Health, Jilin University, Changchun, Jilin 130021, P. R. China.

<sup>b</sup>College of Basic Medical Science, Jilin University, Changchun, Jilin 130021, P.  
R. China

Table S1 Bond lengths [Å] and angles [o] for ZnFLC.

| Bonds         |           |              |           |
|---------------|-----------|--------------|-----------|
| V(1)-O(4)     | 1.601(5)  | V(2)-O(5)    | 1.631(5)  |
| V(1)-O(3)     | 1.799(5)  | V(2)-O(9)    | 1.820(5)  |
| V(1)-O(13)#1  | 1.887(5)  | V(2)-O(10)   | 1.831(5)  |
| V(1)-O(9)#1   | 1.902(5)  | V(2)-O(8)#1  | 1.978(4)  |
| V(1)-O(7)     | 2.113(5)  | V(2)-O(11)   | 2.029(4)  |
| V(1)-O(12)    | 2.288(4)  | V(2)-O(12)#1 | 2.210(4)  |
| V(3)-O(1)     | 1.597(5)  | V(4)-O(6)    | 1.614(5)  |
| V(3)-O(2)     | 2.027(5)  | V(4)-O(13)   | 1.816(5)  |
| V(3)-O(3)#1   | 1.850(5)  | V(4)-O(14)   | 1.841(5)  |
| V(3)-O(14)    | 1.856(5)  | V(4)-O(11)#1 | 2.003(4)  |
| V(3)-O(10)    | 1.904(5)  | V(4)-O(8)    | 2.021(5)  |
| V(3)-O(12)#1  | 2.325(4)  | V(4)-O(12)#1 | 2.237(4)  |
| V(5)-O(7)     | 1.687(4)  | Zn(1)-OW2    | 1.982(6)  |
| V(5)-O(8)     | 1.906(4)  | Zn(1)-OW1    | 2.019(5)  |
| V(5)-O(11)    | 1.932(4)  | Zn(1)-N(1)   | 2.021(6)  |
| V(5)-O(12)    | 2.086(4)  | Zn(1)-N(13)  | 2.122(6)  |
| V(5)-O(12)#1  | 2.181(4)  | Zn(1)-OW3    | 2.180(6)  |
| V(5)-O(2)     | 1.702(4)  | Zn(2)-N(7)   | 2.220(6)  |
| Zn(2)-N(7)#2  | 2.220(6)  | Zn(2)-N(6)   | 2.277(6)  |
| Zn(2)-N(10)   | 2.129(6)  | Zn(2)-N(6)#2 | 2.277(6)  |
| Zn(2)-N(10)#2 | 2.129(6)  | F(5)-C(21)   | 1.333(12) |
| N(1)-C(2)     | 1.349(10) | C(4)-O(17)   | 1.410(8)  |
| N(1)-C(1)     | 1.352(9)  | C(4)-C(5)    | 1.514(9)  |

|                     |           |                   |            |
|---------------------|-----------|-------------------|------------|
| C(1)-N(3)           | 1.317(9)  | C(4)-C(11)        | 1.548(9)   |
| F(1)-C(39)          | 1.346(9)  | F(6)-C(19)        | 1.340(9)   |
| F(2)-C(8)           | 1.365(11) | N(4)-C(13)        | 1.340(9)   |
| C(2)-N(2)           | 1.311(10) | N(4)-N(5)         | 1.364(9)   |
| N(2)-N(3)           | 1.364(8)  | N(4)-C(11)        | 1.458(9)   |
| F(3)-C(10)          | 1.342(10) | C(5)-C(10)        | 1.383(11)  |
| F(4)-C(37)          | 1.355(10) | C(5)-C(6)         | 1.384(10)  |
| C(3)-N(3)           | 1.474(8)  | N(5)-C(12)        | 1.296(10)  |
| C(3)-C(4)           | 1.539(9)  | C(6)-C(7)         | 1.394(11)  |
| N(6)-C(13)          | 1.314(9)  | C(16)-C(17)       | 1.550(10)  |
| N(6)-C(12)          | 1.360(10) | N(16)-C(33)       | 1.320(11)  |
| C(7)-C(8)           | 1.365(16) | N(16)-N(17)       | 1.357(9)   |
| N(7)-C(14)          | 1.327(9)  | N(16)-C(31)       | 1.441(10)  |
| N(7)-C(15)          | 1.361(10) | O(16)-C(17)       | 1.406(8)   |
| C(8)-C(9)           | 1.351(16) | C(17)-C(18)       | 1.517(10)  |
| N(8)-C(15)          | 1.316(11) | C(17)-C(24)#2     | 1.557(9)   |
| N(8)-N(9)           | 1.362(9)  | N(17)-C(32)       | 1.319(12)  |
| C(9)-C(10)          | 1.377(12) | C(18)-C(23)       | 1.387(11)  |
| N(9)-C(14)          | 1.332(9)  | C(18)-C(19)       | 1.388(11)  |
| N(9)-C(16)          | 1.458(9)  | N(18)-C(33)       | 1.313(12)  |
| N(10)-C(27)         | 1.323(10) | N(18)-C(32)       | 1.349(13)  |
| N(10)-C(28)         | 1.335(10) | C(19)-C(20)       | 1.394(12)  |
| N(11)-C(27)         | 1.328(10) | C(20)-C(21)       | 1.351(16)  |
| N(11)-N(12)         | 1.349(9)  | C(21)-C(22)       | 1.359(15)  |
| N(12)-C(28)         | 1.325(9)  | C(22)-C(23)       | 1.412(13)  |
| N(12)-C(29)         | 1.456(9)  | C(24)-C(17)#2     | 1.557(9)   |
| N(13)-C(25)         | 1.331(10) | C(29)-C(30)       | 1.541(10)  |
| N(13)-C(26)         | 1.374(10) | C(30)-C(34)       | 1.527(10)  |
| N(14)-C(26)         | 1.309(11) | C(30)-C(31)       | 1.551(10)  |
| N(14)-N(15)         | 1.361(9)  | C(34)-C(39)       | 1.371(10)  |
| N(15)-C(25)         | 1.312(9)  | C(34)-C(35)       | 1.374(10)  |
| N(15)-C(24)         | 1.460(9)  | C(35)-C(36)       | 1.393(11)  |
| O(15)-C(30)         | 1.437(9)  | C(36)-C(37)       | 1.369(13)  |
| C(37)-C(38)         | 1.366(13) | C(38)-C(39)       | 1.374(12)  |
| Angle               |           |                   |            |
| O(4)-V(1)-O(3)      | 103.6(2)  | O(5)-V(2)-O(9)    | 102.2(2)   |
| O(4)-V(1)-O(13)#1   | 102.1(2)  | O(5)-V(2)-O(10)   | 102.7(2)   |
| O(3)-V(1)-O(13)#1   | 92.9(2)   | O(9)-V(2)-O(10)   | 94.1(2)    |
| O(4)-V(1)-O(9)#1    | 100.0(2)  | O(5)-V(2)-O(8)#1  | 99.1(2)    |
| O(3)-V(1)-O(9)#1    | 92.6(2)   | O(9)-V(2)-O(8)#1  | 92.3(2)    |
| O(13)#1-V(1)-O(9)#1 | 155.2(2)  | O(10)-V(2)-O(8)#1 | 155.36(19) |
| O(4)-V(1)-O(7)      | 99.2(2)   | O(5)-V(2)-O(11)   | 98.3(2)    |
| O(3)-V(1)-O(7)      | 157.2(2)  | O(9)-V(2)-O(11)   | 157.95(19) |
| O(13)#1-V(1)-O(7)   | 82.63(18) | O(10)-V(2)-O(11)  | 89.07(19)  |

|                     |            |                      |            |
|---------------------|------------|----------------------|------------|
| O(9)#1-V(1)-O(7)    | 82.96(19)  | O(8)#1-V(2)-O(11)    | 76.48(18)  |
| O(4)-V(1)-O(12)     | 173.4(2)   | O(5)-V(2)-O(12)#1    | 173.9(2)   |
| O(3)-V(1)-O(12)     | 82.90(19)  | O(9)-V(2)-O(12)#1    | 82.09(18)  |
| O(13)#1-V(1)-O(12)  | 78.48(17)  | O(10)-V(2)-O(12)#1   | 81.11(18)  |
| O(9)#1-V(1)-O(12)   | 78.30(17)  | O(8)#1-V(2)-O(12)#1  | 76.26(16)  |
| O(7)-V(1)-O(12)     | 74.32(16)  | O(11)-V(2)-O(12)#1   | 76.87(16)  |
| O(1)-V(3)-O(3)#1    | 104.3(2)   | O(6)-V(4)-O(13)      | 102.8(2)   |
| O(1)-V(3)-O(14)     | 103.8(3)   | O(6)-V(4)-O(14)      | 102.9(2)   |
| O(3)#1-V(3)-O(14)   | 92.3(2)    | O(13)-V(4)-O(14)     | 96.7(2)    |
| O(1)-V(3)-O(10)     | 100.6(3)   | O(6)-V(4)-O(11)#1    | 98.7(2)    |
| O(3)#1-V(3)-O(10)   | 89.3(2)    | O(13)-V(4)-O(11)#1   | 90.83(19)  |
| O(14)-V(3)-O(10)    | 154.4(2)   | O(14)-V(4)-O(11)#1   | 154.91(19) |
| O(1)-V(3)-O(2)      | 99.5(2)    | O(6)-V(4)-O(8)       | 99.0(2)    |
| O(3)#1-V(3)-O(2)    | 156.1(2)   | O(13)-V(4)-O(8)      | 156.10(19) |
| O(14)-V(3)-O(2)     | 84.09(19)  | O(14)-V(4)-O(8)      | 87.92(19)  |
| O(10)-V(3)-O(2)     | 84.18(19)  | O(11)#1-V(4)-O(8)    | 76.10(17)  |
| O(1)-V(3)-O(12)#1   | 174.3(2)   | O(6)-V(4)-O(12)#1    | 173.8(2)   |
| O(3)#1-V(3)-O(12)#1 | 80.82(18)  | O(13)-V(4)-O(12)#1   | 81.30(18)  |
| O(14)-V(3)-O(12)#1  | 78.37(18)  | O(14)-V(4)-O(12)#1   | 81.03(18)  |
| O(10)-V(3)-O(12)#1  | 76.66(17)  | O(11)#1-V(4)-O(12)#1 | 76.49(16)  |
| O(2)-V(3)-O(12)#1   | 75.27(16)  | O(8)-V(4)-O(12)#1    | 76.27(16)  |
| O(7)-V(5)-O(2)      | 106.3(2)   | O(2)-V(5)-O(12)      | 164.6(2)   |
| O(7)-V(5)-O(8)      | 98.9(2)    | O(8)-V(5)-O(12)      | 80.84(17)  |
| O(2)-V(5)-O(8)      | 97.0(2)    | O(11)-V(5)-O(12)     | 81.71(17)  |
| O(7)-V(5)-O(11)     | 98.2(2)    | O(7)-V(5)-O(12)#1    | 167.86(19) |
| O(2)-V(5)-O(11)     | 95.2(2)    | O(2)-V(5)-O(12)#1    | 85.83(19)  |
| O(8)-V(5)-O(11)     | 155.27(19) | O(8)-V(5)-O(12)#1    | 79.97(17)  |
| O(7)-V(5)-O(12)     | 89.09(19)  | O(11)-V(5)-O(12)#1   | 79.56(17)  |
| O(12)-V(5)-O(12)#1  | 78.79(18)  |                      |            |

Symmetry transformations used to generate equivalent atoms: #1 -x+1,-y-1,-z-1; #2 -x,-y,-z

**Table S2.** Ergosterol content of *C. albicans* HL 973 treated with or without Drugs. Data are presented as the mean  $\pm$  SD of three independent experiments. \*P<0.05 for FCZ and ZnFLC vs. control, #P<0.05 for ZnFLC vs. FCZ

|       | Concentration ( $\mu\text{g}/\text{mL}$ ) | Ergosterol content(mg/mL) |
|-------|-------------------------------------------|---------------------------|
| DMSO  | -                                         | 7.46 $\pm$ 0.01           |
| FCZ   | 16                                        | 4.30 $\pm$ 0.01*          |
| ZnFLC | 16                                        | 0.60 $\pm$ 0.028* #       |

**Table S3.** Primers used for Real-Time PCR.

| Gene | Primer sequence (5'-3')   | Size (bp) |
|------|---------------------------|-----------|
| 18S  | F:TCTTTCTTGATTTTGTGGTGG   | 150       |
|      | R: TCGATAGTCCCTCTAAGAAGTG |           |

|       |                                                     |     |
|-------|-----------------------------------------------------|-----|
| ERG1  | F: AAGGGCAAAGGTCATGTGTT<br>R: CGTTAGCAGCAGAAGGAGGT  | 121 |
| ERG7  | F: TTATGCGTCGATGTTTGCAT<br>R: CCACCGTCTGGAAGTTGTTT  | 117 |
| ERG11 | F: TTTGACCGTTCATTTGCTCA<br>R: GCAGCATCACGTCTCCAATA  | 110 |
| ERG27 | F: TTGCTGCTGCTTTAGGTCAA<br>R: GTCCAGACCAGTGTCTCAA   | 110 |
| ERG28 | F: GCAAGAACTTTTGGAACTTGG<br>R: TGCAGCAATAGCAAATGTGA | 117 |

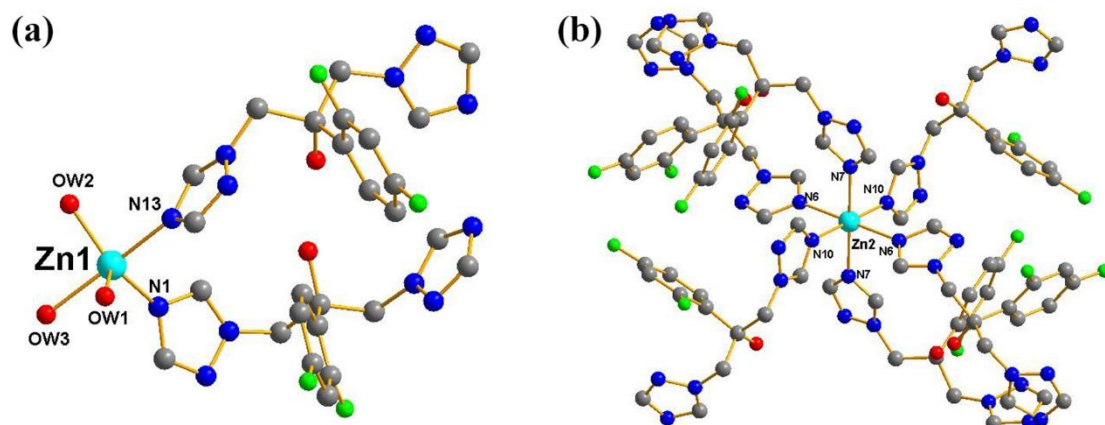

Fig. S1 (a) and (b) Ball-stick representations of the coordination modes of Zn1 and Zn2 in ZnFLC.

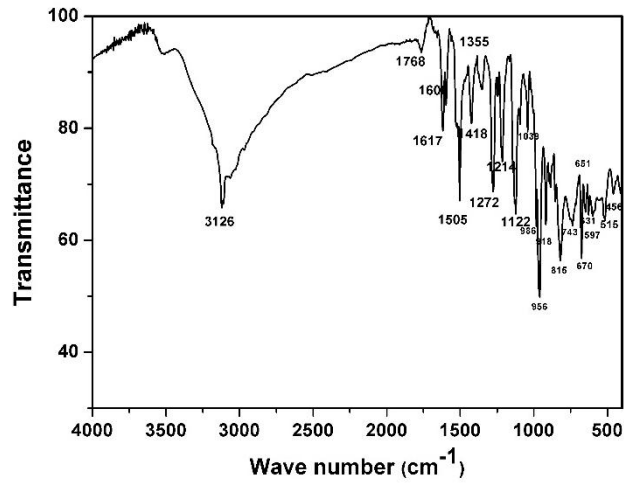

Fig. S2. FT-IR spectrum of ZnFLC.

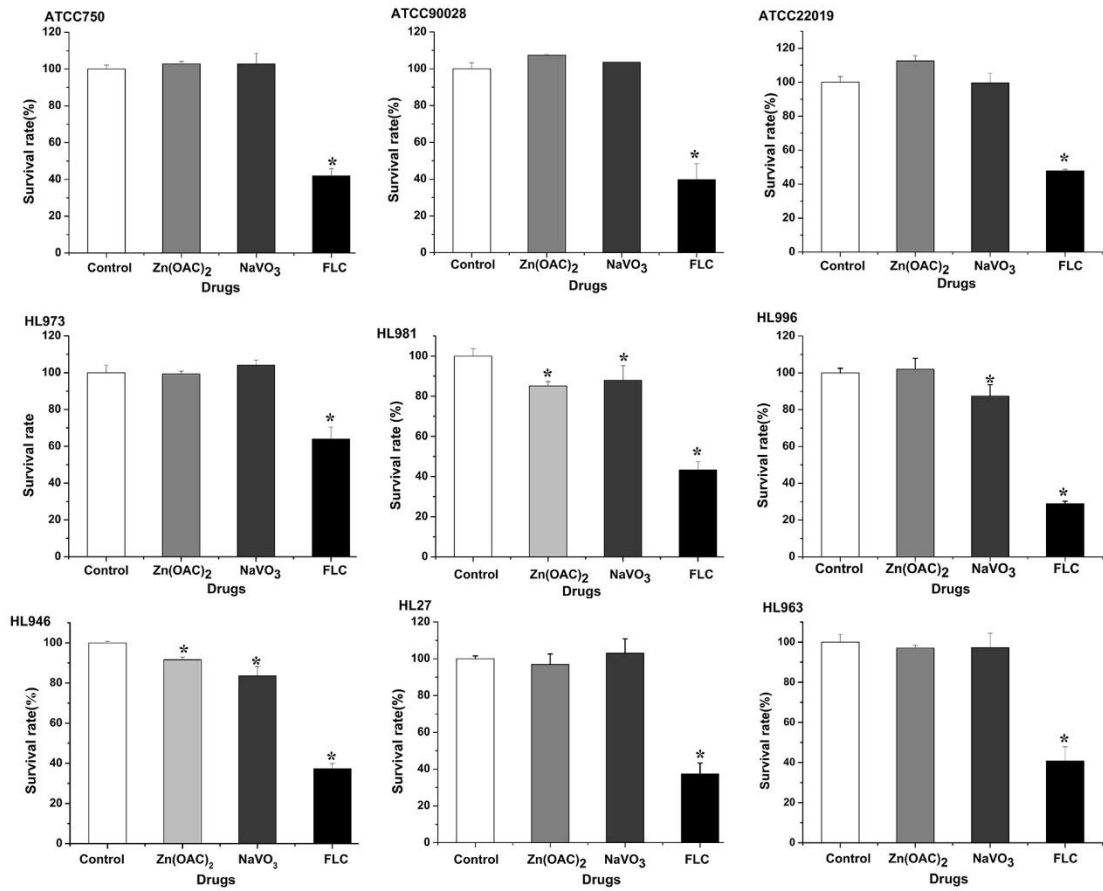

Fig. S3. The viability effects of Zn(OAC)<sub>2</sub>·H<sub>2</sub>O and NaVO<sub>3</sub> on 9 *C. albicans* strains with the equivalent doses (%wt) in ZnFLC (MIC<sub>80</sub>) by MTX assay. Data are presented as the mean ± SD of three independent experiments.

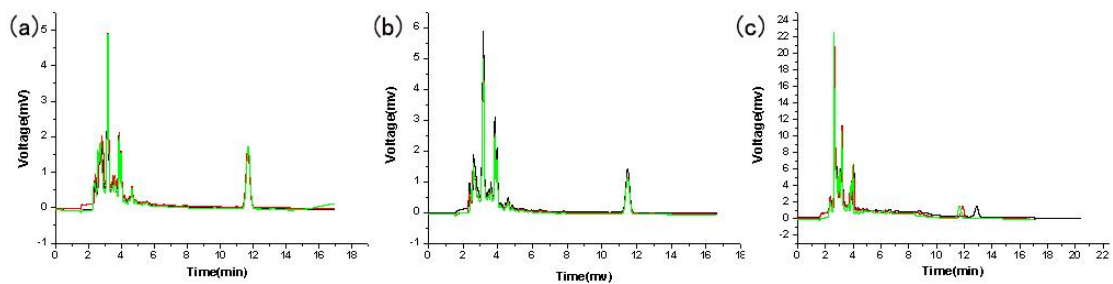

**Fig. S4** HPLC graphs of ergosterol in *C. albicans* HL973 treated by DMSO (a), FLC (b) and ZnFLC (c). The ergosterol extraction of DMSO, FLC and ZnFLC were diluted into 10, 10, and 1mL with methanol. The retention time of ergosterol was about 12.9 min. Each graph displayed three repeated experiments.
